# Supplementary material
Source: PubMed Central journal article supplement (PMC4273411)
Supplement: pnas.201420645SI.pdf [file pnas.201420645SI.pdf]

# Supporting Information

Xia and Springer 10.1073/pnas.1420645111

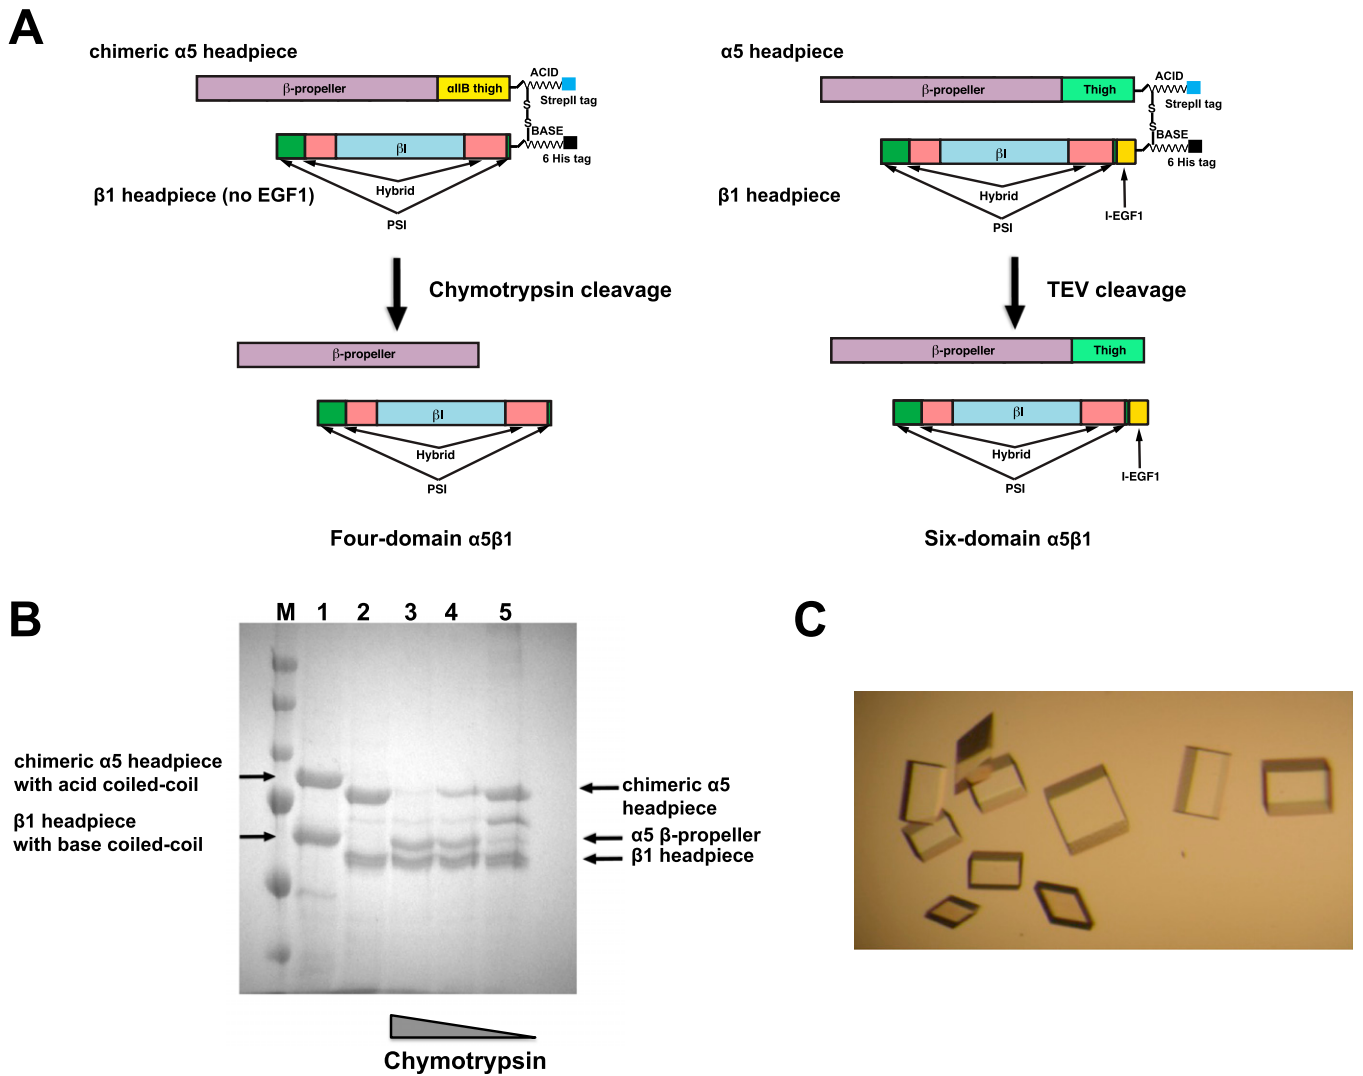

**Fig. S1.**  $\alpha_5\beta_1$  headpiece construct design, protease digestion, and crystallization. (A) Schematic illustration of chimeric  $\alpha_5\beta_1$  headpiece (Left) and wild-type  $\alpha_5\beta_1$  headpiece (Right) constructs. (B) Cleavage of the thigh domain of chimeric protein analyzed by reducing SDS/PAGE. Lanes: M, markers; 1, control uncleaved integrin; 2–5, various protease:integrin ratios (wt:wt); 2, TEV:integrin 1:4; 3, chymotrypsin:integrin 1:100; 4, chymotrypsin:integrin 1:200; 5, chymotrypsin:integrin 1:500. (C) Crystals of the four-domain  $\alpha_5\beta_1$  headpiece after microseeding.



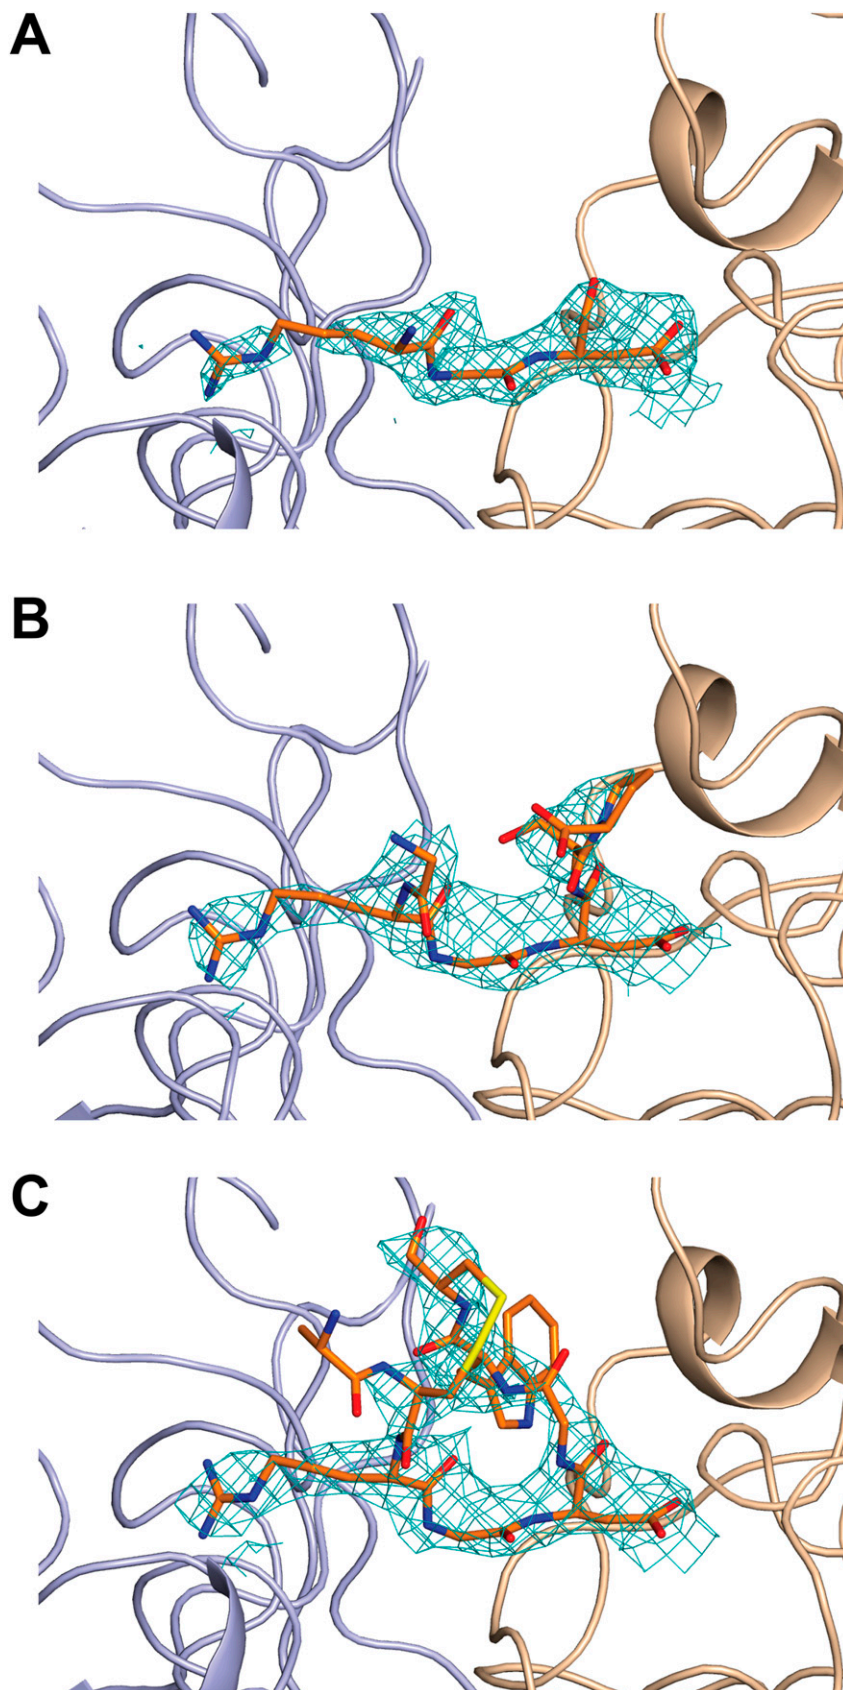

**Fig. S3.** Density of bound ligands. Simulated-annealing omit maps for GRGDSP peptide soaked in the presence (A) and absence (B) of  $\text{Ca}^{2+}$  and for cyclic ACRGDGWCW peptide (C). Ligands (orange) are shown in stick representation. The  $2F_o - F_c$  simulated-annealing ligand omit map densities (cyan) are shown in mesh at  $1\sigma$ .  $\alpha_5$  (light blue) and  $\beta_1$  (wheat) are shown as cartoons.

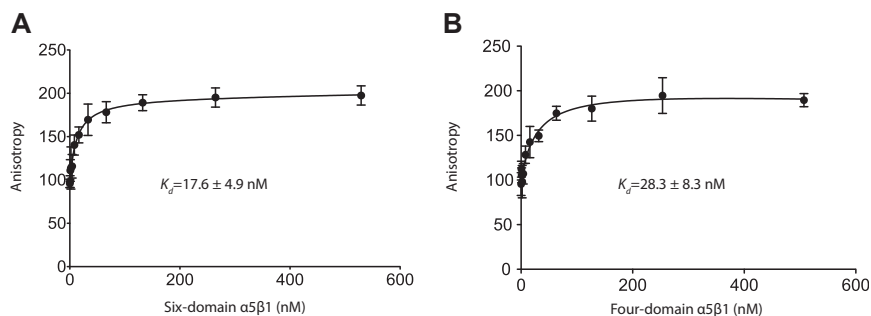

**Fig. S4.** Fluorescence anisotropy saturation binding. Saturation binding of six-domain  $\alpha_5\beta_1$  integrin (A) and four-domain  $\alpha_5\beta_1$  integrin (B) to FITC-aminohexyl-A\*CRGDGWC\*G cyclic peptide. Experiments were performed in 20 mM Tris-buffered saline with 1 mM  $Mn^{2+}$  and 0.1 mM  $Ca^{2+}$  (pH 7.4) with 2 nM FITC cyclic RGD peptide. Data represent mean  $\pm$  SD of triplicate samples.

**Table S1.** Data collection and refinement statistics

|                                   | $\alpha_5\beta_1$                             | $\alpha_5\beta_1$ + GRGDSP + 5 mM $Mg^{2+}$ /1 mM $Ca^{2+}$ | $\alpha_5\beta_1$ + GRGDSP + 5 mM $Mg^{2+}$   | $\alpha_5\beta_1$ + ACRGDGWC + 1 mM $Mg^{2+}$ /1 mM $Ca^{2+}$ |
|-----------------------------------|-----------------------------------------------|-------------------------------------------------------------|-----------------------------------------------|---------------------------------------------------------------|
| Data                              |                                               |                                                             |                                               |                                                               |
| Space group                       | P2 <sub>1</sub> 2 <sub>1</sub> 2 <sub>1</sub> | P2 <sub>1</sub> 2 <sub>1</sub> 2 <sub>1</sub>               | P2 <sub>1</sub> 2 <sub>1</sub> 2 <sub>1</sub> | P2 <sub>1</sub> 2 <sub>1</sub> 2 <sub>1</sub>                 |
| Cell dimensions                   |                                               |                                                             |                                               |                                                               |
| a, b, c, Å                        | 52.1, 116.8, 159.5                            | 61.1, 117.1, 167.1                                          | 61.0, 118.4, 170.3                            | 57.5, 112.2, 169.6                                            |
| $\alpha$ , $\beta$ , $\gamma$ , ° | 90, 90, 90                                    | 90, 90, 90                                                  | 90, 90, 90                                    | 90, 90, 90                                                    |
| Resolution, Å                     | 47.1–1.85                                     | 47.94–1.78                                                  | 42.57–2.50                                    | 47.60–2.50                                                    |
| Reflections, total/unique         | 292,419/82,697                                | 410,297/113,328                                             | 157,294/42,741                                | 140,454/38,535                                                |
| Completeness, %                   | 98.4 (93.5)                                   | 98.2 (99.6)                                                 | 98.2 (99.7)                                   | 99.3 (99.9)                                                   |
| $CC_{1/2}$ , % <sup>†</sup>       | 99.4 (16.9)                                   | 99.4 (11.8)                                                 | 99.6 (28.2)                                   | 99.6 (19.2)                                                   |
| $CC^*$ , % <sup>‡</sup>           | 99.9 (53.7)                                   | 99.8 (45.9)                                                 | 99.9 (60.4)                                   | 99.9 (56.8)                                                   |
| $I/\sigma(I)$                     | 6.55 (0.45)                                   | 7.17 (0.34)                                                 | 7.46 (0.62)                                   | 7.17 (0.66)                                                   |
| $R_{merge}$ , % <sup>§</sup>      | 12.6 (210.7)                                  | 15.4 (342.2)                                                | 14.4 (276.3)                                  | 10.6 (210.0)                                                  |
| Redundancy                        | 3.5 (2.7)                                     | 3.6 (3.3)                                                   | 3.7 (3.7)                                     | 3.6 (3.7)                                                     |
| Refinement                        |                                               |                                                             |                                               |                                                               |
| $R_{work}$                        | 0.191 (0.397)                                 | 0.187 (0.423)                                               | 0.210 (0.403)                                 | 0.187 (0.392)                                                 |
| $R_{free}$ <sup>¶</sup>           | 0.238 (0.392)                                 | 0.223 (0.468)                                               | 0.254 (0.455)                                 | 0.236 (0.388)                                                 |
| $CC_{work}$ , % <sup>#</sup>      | 95.9 (39.7)                                   | 97.3 (28.8)                                                 | 94.5 (53.9)                                   | 96.5 (46.8)                                                   |
| $CC_{free}$ , % <sup>#</sup>      | 94.6 (36.5)                                   | 94.9 (39.8)                                                 | 93.3 (48.4)                                   | 94.6 (37.8)                                                   |
| Ramachandran, % <sup>  </sup>     | 96.0/3.7/0.3                                  | 96.2/3.7/0.1                                                | 95.5/4.3/0.2                                  | 93.7/5.9/0.4                                                  |
| Bond rmsd, Å                      | 0.011                                         | 0.007                                                       | 0.003                                         | 0.005                                                         |
| Angle rmsd, °                     | 1.06                                          | 1.09                                                        | 0.71                                          | 0.98                                                          |
| MolProbity score <sup>**</sup>    | 1.15 (99%)                                    | 1.24 (99%)                                                  | 1.26 (100%)                                   | 1.40 (100%)                                                   |
| Clash score                       | 1.38 (100%)                                   | 2.12 (99%)                                                  | 1.88 (100%)                                   | 2.12 (100%)                                                   |
| PDB ID code                       | 4WJK                                          | 4WK0                                                        | 4WK2                                          | 4WK4                                                          |

Values for highest-resolution shells are in parentheses.

<sup>†</sup> $CC_{1/2}$  = Pearson's correlation coefficient between average intensities of random half-datasets for each unique reflection.

<sup>‡</sup> $CC^* = \sqrt{2CC_{1/2}/(1+CC_{1/2})}$ .

<sup>§</sup> $R_{merge} = \sum_i |I(i,h) - \langle I(h) \rangle| / \sum_i I(i,h)$ , where  $I(i,h)$  and  $\langle I(h) \rangle$  are the  $i$ th and mean measurement of intensity of reflection  $h$ .

<sup>¶</sup> $R_{free}$  was calculated using 5% of the data.

<sup>#</sup>Correlation coefficients of the observed intensities with the model-based intensities for the work ( $CC_{work}$ ) and test ( $CC_{free}$ ) sets.

<sup>||</sup>Residues in favored, accepted, and outlier regions of the Ramachandran plot as reported by MolProbity.

<sup>\*\*</sup>MolProbity (1) score and percentile among structures of comparable resolution.

1. Chen VB, et al. (2010) MolProbity: All-atom structure validation for macromolecular crystallography. *Acta Crystallographica* D66:12–21.
